# Supplementary material for: A novel Sn2Nb2O7/defective carbon nitride heterojunction photocatalyst: preparation and application for photocatalytic oxytetracycline removal
Source: Royal Society of Chemistry journal article supplement (doi:10.1039/d2ce00427e), 2022-01-01
Supplement: d2ce00427e1.pdf [file d2ce00427e1.pdf]

Supporting Information for:

A novel  $\text{Sn}_2\text{Nb}_2\text{O}_7$ /defective carbon nitride heterojunction photocatalyst:  
preparation and application for photocatalytic oxytetracycline removal.

Haoyu Zhang<sup>a</sup>, Liman Peng<sup>c</sup>, Huawei Li<sup>d</sup>, Yiguo Su<sup>b\*</sup> and Shushu Huang<sup>a\*</sup>

<sup>a</sup>College of Light Industry and Textile, Inner Mongolia University of Technology,  
Hohhot, 010080, China

<sup>b</sup>College of Chemistry and Chemical Engineering, Inner Mongolia University, Hohhot,  
Inner Mongolia 010021, P. R. China

<sup>c</sup>Transportation Institute, Inner Mongolia University, Hohhot, Inner Mongolia  
010021, P. R. China

<sup>d</sup>Ecological Environment Monitoring and Monitoring Center Wuhai, Wuhai 016040,  
China

Fig. S1 XRD patterns of g- $\text{C}_3\text{N}_4$  and HCN.

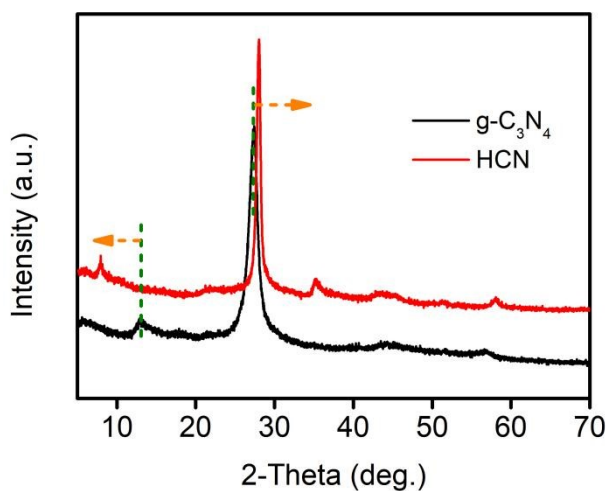

Clearly, it can be seen that the crystalline of HCN was improved after the modification of KSCN and acid. Meanwhile, the diffraction peaks of HCN shifted from  $13.0^\circ$  to  $8.0^\circ$  and  $27.3^\circ$  to  $28.1^\circ$  in comparison with g- $\text{C}_3\text{N}_4$ , indicating a larger in-plane arrangement distance and a compacted packing of heptazine layers.<sup>1,2</sup>

Fig. S2 FT-IR spectra of g-C<sub>3</sub>N<sub>4</sub> and HCN.

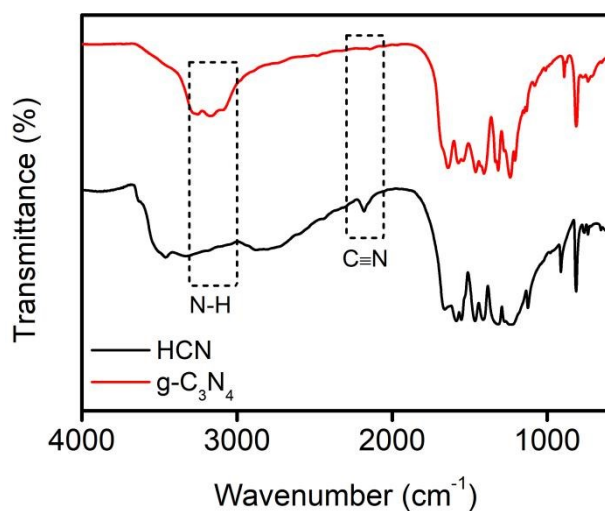

The additional peak appeared at 2180 cm<sup>-1</sup> in HCN can be related to the formation of -C≡N, deriving from the residual thiocyanogen groups.<sup>3</sup> Meanwhile, the peak intensity of N-H in HCN sample weakened compared with g-C<sub>3</sub>N<sub>4</sub>, suggesting that the generation of -C≡N groups was from the deprotonation of NH<sub>x</sub> group.<sup>4</sup> Based on the above analysis, cyano- group was introduced in HCN, which could act as defective centers to boost the separation of photoinduced carriers.

Fig. S3 EPR spectra of g-C<sub>3</sub>N<sub>4</sub> and HCN.

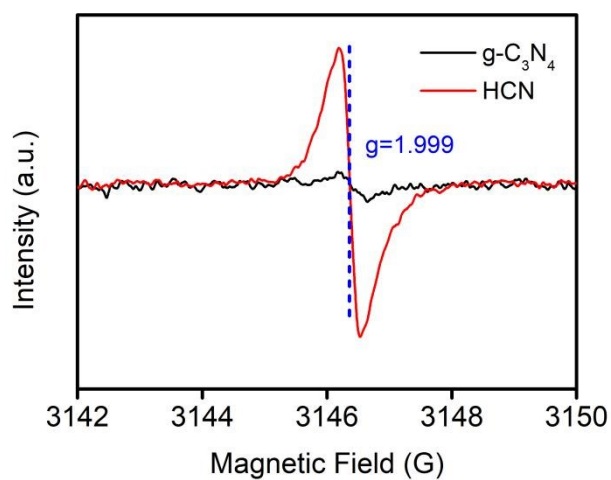

According to previous report, an EPR signal ( $g = 1.999$ ) belonged to unpaired electrons on the  $sp^2$ -carbon atoms of aromatic rings within  $\pi$ -bonded nanosized clusters, revealing the formation of nitrogen vacancies in carbon nitride.<sup>5</sup> A higher EPR signal intensity of HCN was attributed to the introduction of cyano- groups, then accelerating the generation of unpaired electrons.

Fig. S4 TEM image of HCN (a) and  $\text{Sn}_2\text{Nb}_2\text{O}_7$  (b).

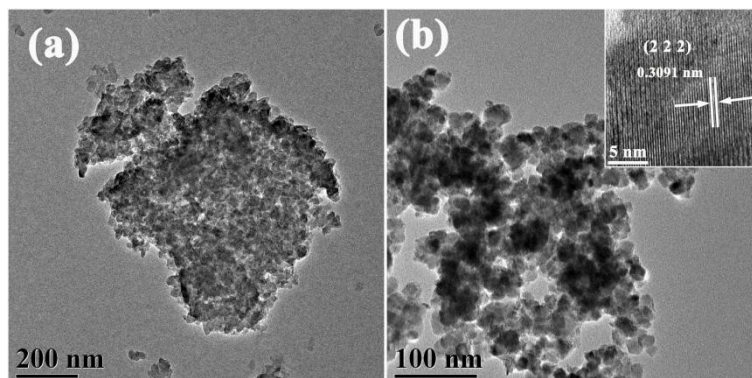

Fig. S5 Mott-Schottky plots of  $\text{Sn}_2\text{Nb}_2\text{O}_7$  (a) and HCN (b).

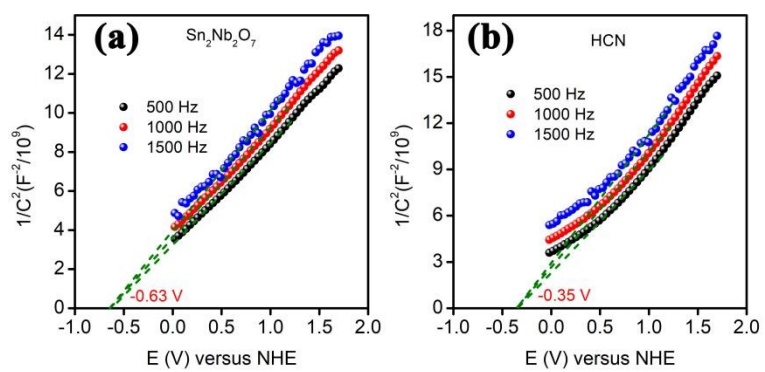

Fig. S6 Electronic structure of  $\text{Sn}_2\text{Nb}_2\text{O}_7$ .

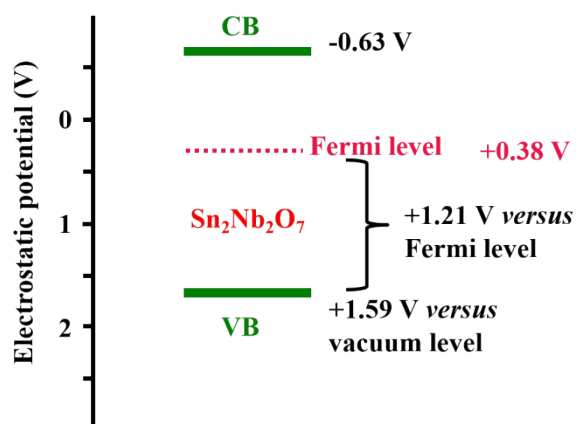

The Fermi levels of  $\text{Sn}_2\text{Nb}_2\text{O}_7$  and HCN were calculated by the results of VB-XPS and valence band energy results. As shown in Fig. S6, the VBM of  $\text{Sn}_2\text{Nb}_2\text{O}_7$  versus vacuum level and Fermi level was 1.59 V and 1.21 V, respectively. The Fermi level of  $\text{Sn}_2\text{Nb}_2\text{O}_7$  was calculated to be 0.38 V by subtracting the 1.21 V with 1.59 V. Similarly, the Fermi level of HCN was calculated to be 0.12 V.<sup>6</sup>

Fig. S7 The relationship between  $\ln(C_0/C)$  and irradiation time for the degradation of OTC over all samples.

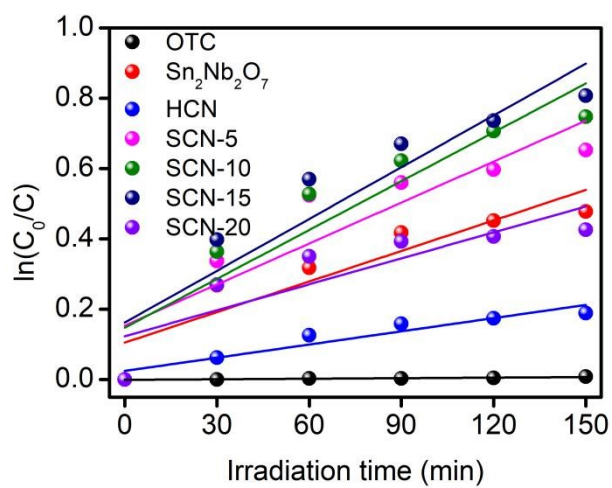

Fig. S8 Transient photocurrent response of samples.

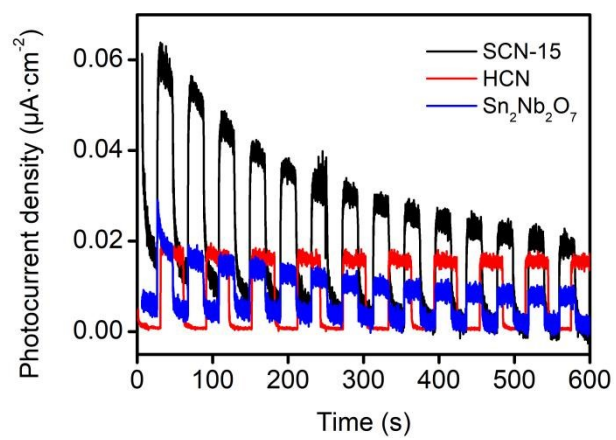



## References:

1. J. Yuan, Y. Tang, X. Yi, C. Liu, C. Li, Y. Zeng and S. Luo, *Appl. Catal. B: Environmental*, 2019, **251**, 206-212.
2. H. Li, B. Zhu, S. Cao and J. Yu, *Chem. Commun.*, 2020, **56**, 5641-5644.
3. H. Yu, R. Shi, Y. Zhao, T. Bian, Y. Zhao, C. Zhou, G.I.N. Waterhouse, L. Wu, C. Tung and T. Zhang, *Adv. Mater.*, 2017, **29**, 1605148.
4. J. Liu, Z. Wei, W. Fang, Z. Jiang and W. Shangguan, *ChemCatChem*, 2019, **11**, 6275-6281.
5. L. Yang, J. Huang, L. Shi, L. Cao, Q. Yu, Y. Jie, J. Fei, H. Ouyang and J. Ye, *Appl. Catal. B: Environmental*, 2017, **204**, 335-345.
6. J. Tang, R. Guo, W. Zhou, C. Huang, W. Pan, *Appl. Catal. B: Environmental*, 2018, **237**, 802-810.
